# Supplementary material for: Triangulating Causality Between Childhood Obesity and Neurobehavior: Twin and Longitudinal Evidence
Source: bioRxiv or medRxiv preprint supplement (doi:10.1101/2022.04.12.22273769), 2022-06-30
Supplement: Supplementary file [file media-1.pdf]

***Triangulating Causality Between Childhood Obesity and  
Neurobehavior: Twin and Longitudinal Evidence.***

**Supplementary Information**

**Table S1**

*Exclusion of cases (baseline wave)*

|                                                                                                 | N     | %    |
|-------------------------------------------------------------------------------------------------|-------|------|
| Total available at baseline                                                                     | 11933 | 100  |
| Excluded of missing important values (sex, puberty, race, ethnicity, age, %BMI <sub>p95</sub> ) | 1062  | 8.9  |
| Excluded for Medical Condition (diabetes, brain injury, cancer, cerebral palsy, epilepsy)       | 412   | 3.5  |
| Excluded for BMI calculation error                                                              | 38    | 0.3  |
| Excluded for underweight BMI                                                                    | 212   | 1.8  |
| Excluded for taking birth control                                                               | 2     | <0.1 |
| Excluded of inaccurate relatedness info                                                         | 680   | 5.7  |
| Total at baseline after exclusion                                                               | 9527  | 79.8 |

*Note.* %BMI<sub>p95</sub>, percentage of the sex- and age-specific 95th BMI percentile.

10 **Table S2**11 *Demographic information*

|                              | Singletons (N = 7016) |      | Siblings (N = 2511) |      |
|------------------------------|-----------------------|------|---------------------|------|
|                              | M                     | SD   | M                   | SD   |
| Age (months)                 | 118.6                 | 7.3  | 119.8               | 7.9  |
| %BMIp95                      | 85.0                  | 17.9 | 82.0                | 16.4 |
|                              | n                     | %    | n                   | %    |
| Obese BMI                    | 1239                  | 17.7 | 334                 | 13.3 |
| Sex at birth                 |                       |      |                     |      |
| -Male                        | 3665                  | 52.2 | 1288                | 51.3 |
| -Female                      | 3349                  | 47.7 | 1223                | 48.7 |
| -Other                       | 2                     | 0.1  | 0                   | -    |
| Race                         |                       |      |                     |      |
| -White                       | 4449                  | 63.4 | 1758                | 70.0 |
| -Black/African American      | 1044                  | 14.9 | 323                 | 12.9 |
| -Other/multiple              | 1523                  | 21.7 | 430                 | 17.1 |
| Hispanic ethnicity           | 1589                  | 22.6 | 348                 | 13.9 |
| Handedness                   |                       |      |                     |      |
| -Right                       | 5603                  | 79.9 | 1993                | 79.4 |
| -Left                        | 475                   | 6.8  | 197                 | 7.8  |
| -Mixed                       | 938                   | 13.4 | 321                 | 12.8 |
| College education of mother  | 5813                  | 82.9 | 2235                | 89.0 |
| Family income                |                       |      |                     |      |
| -Less than \$5,000           | 228                   | 3.2  | 62                  | 2.5  |
| -\$5,000 through \$11,999    | 244                   | 3.5  | 69                  | 2.7  |
| -\$12,000 through \$15,999   | 168                   | 2.4  | 32                  | 1.3  |
| -\$16,000 through \$24,999   | 318                   | 4.5  | 94                  | 3.7  |
| -\$25,000 through \$34,999   | 412                   | 5.9  | 103                 | 4.1  |
| -\$35,000 through \$49,999   | 574                   | 8.2  | 181                 | 7.2  |
| -\$50,000 through \$74,999   | 876                   | 12.5 | 341                 | 13.6 |
| \$75,000 through \$99,999    | 959                   | 13.7 | 362                 | 14.1 |
| -\$100,000 through \$199,999 | 1928                  | 27.5 | 798                 | 31.8 |
| -\$200,000 and greater       | 735                   | 10.5 | 324                 | 12.9 |
| -No information              | 574                   | 8.2  | 145                 | 5.8  |

Parent informant

|                           |      |      |      |      |
|---------------------------|------|------|------|------|
| -Childs Biological Mother | 6012 | 85.7 | 2191 | 87.3 |
| -Childs Biological Father | 684  | 9.7  | 225  | 9.0  |
| -Adoptive Parent          | 173  | 2.5  | 49   | 2.0  |
| -Childs Custodial Parent  | 64   | 0.9  | 17   | 0.7  |
| -Other                    | 83   | 1.2  | 29   | 1.2  |

---

*Note.* Children were considered having obesity when their percentage of the sex- and age-specific 95th BMI percentile was equal or greater 100. %BMI<sub>p95</sub>, percentage of the sex- and age-specific 95th BMI percentile.

16 **Table S3**17 *Composition of poly-phenotype scores*

|                             | DoC                                                                                     | Random-Intercept<br>CLPM                                                                                      | Traditional CLPM                                                                   |
|-----------------------------|-----------------------------------------------------------------------------------------|---------------------------------------------------------------------------------------------------------------|------------------------------------------------------------------------------------|
| Calculation method          | Weights obtained from singletons, applied to siblings                                   | Weights obtained from singletons (baseline) using 10-fold cross-validation, applied to singletons (all waves) |                                                                                    |
| Personality/psychopathology | CBCL (116 items),<br>SDQ-PSB (3 items),<br>UPPS-P (20 items),<br>BIS/BAS (20 items)     | CBCL (116 items),<br>PSB (3 items)                                                                            | CBCL (116 items),<br>PSB (3 items),<br>UPPS-P (20 items),<br>BIS/BAS (20 items)    |
| Eating behavior             | overeating,<br>doesn't eat well                                                         | overeating,<br>doesn't eat well                                                                               | overeating,<br>doesn't eat well                                                    |
| Cognition                   | NIH-TB (7 scores),<br>RAVLT (3 scores),<br>LMT (2 score),<br>WISC Matrix test (1 score) | -                                                                                                             | NIH-TB (5 scores),<br>RAVLT (3 scores),<br>LMT (2 score),<br>Matrix test (1 score) |
| Brain morphology factors    | 68 MRI regions of interest                                                              | -                                                                                                             | 68 MRI regions of interest                                                         |

18 *Note.* For description of instruments see Data Dictionary at [https://nda.nih.gov/general-](https://nda.nih.gov/general-query.html)  
19 [query.html](https://nda.nih.gov/general-query.html). BIS/BAS, Behavioral Inhibition System/Behavioral Activation System Scale  
20 (Carver & White, 1994); CBCL, Child Behavior Checklist (Achenbach & Edelbrock, 1983);  
21 CLPM, cross-lagged panel model; DoC, Direction of Causation; LMT, Little Man Task

(Ratcliff, 1979); NIH-TB, NIH Toolbox for the Assessment of Neurological and Behavioral  
Function domain Cognition (Dimensional Change Card Sort Test and List Sorting Working  
Memory Test unique to baseline wave; Weintraub et al., 2013); RAVLT, Rey Auditory  
Verbal Learning Test (Lezak, 1976); SDQ-PSB, Strength and Difficulties Questionnaire  
subscale Prosocial Behavior (Goodman, 1997); UPPS-P urgency-premeditation-perseverance-  
sensation seeking-positive urgency Impulsive Behaviors Scale (Cyders et al., 2014); WISC,  
Wechsler Intelligence Scale for Children (Wechsler, 1949).

**Table S4**

*Estimates (below diagonal) and sample sizes (above diagonal) for correlation analyses between percentage of the sex- and age-specific 95th BMI percentile (%BMI<sub>p95</sub>) and neurobehavior poly-phenotype scores*

| Variable                       | 1      | 2      | 3      | 4    | 5      | 6      | 7    |
|--------------------------------|--------|--------|--------|------|--------|--------|------|
| 1. %BMI <sub>p95</sub>         | —      | 2469   | 2475   | 2296 | 2391   | 2391   | 2391 |
| 2. Personality/psychopathology | .09*** | —      | 2469   | 2292 | 2386   | 2386   | 2386 |
| 3. Eating behavior             | .36*** | .16*** | —      | 2295 | 2390   | 2390   | 2390 |
| 4. Cognition                   | .04*   | .11*** | .04    | —    | 2219   | 2219   | 2219 |
| 5. Cortical thickness          | .14*** | -.02   | .09*** | .00  | —      | 2391   | 2391 |
| 6. Cortical surface area       | .06**  | .02    | .05**  | .01  | .12*** | —      | 2391 |
| 7. Cortical volume             | .07*** | -.01   | .03    | -.01 | .21*** | .35*** | —    |

*Note.* Weights were trained on singletons and applied to siblings using all available data per variable combination. Associations are shown for the sibling subset. All correlations controlled for family structure. \*  $p < .05$ ; \*\*  $p < .01$ ; \*\*\*  $p < .001$ .

38 **Table S5**

39 *Sibling pair sample sizes for twin modelling (including Direction of Causation)*

|                             | N <sub>MZ</sub> | N <sub>DZ</sub> | N <sub>total</sub> |
|-----------------------------|-----------------|-----------------|--------------------|
| Personality/psychopathology | 259             | 954             | 1213               |
| Eating behavior             | 259             | 959             | 1218               |
| Cognition                   | 228             | 828             | 1056               |
| Cortical thickness          | 245             | 893             | 1138               |
| Cortical surface area       | 245             | 893             | 1138               |
| Cortical volume             | 245             | 893             | 1138               |

40 *Note.* MZ, monozygotic twin pairs; DZ, dizygotic twin or sibling pairs.

41

**Table S6**

*Cholesky ACE model estimates of sex- and age-specific 95th BMI percentile (%BMI<sub>p95</sub>) and neurobehavior poly-phenotype scores*

| Variable                    | A (%) | C (%) | E (%) | r <sub>a</sub> | r <sub>e</sub> |
|-----------------------------|-------|-------|-------|----------------|----------------|
| %BMI <sub>p95</sub>         | 89.5  | -     | 10.5  | -              | -              |
| Personality/psychopathology | 48.6  | 10.6  | 40.8  | .11            | .15            |
| Eating behavior             | 6.6   | -     | 93.4  | >.99           | .48            |
| Cognition                   | 31.4  | -     | 68.6  | .09            | -.01           |
| Cortical thickness          | 57.5  | -     | 42.5  | .22            | .02            |
| Cortical surface area       | 36.6  | 9.6   | 53.8  | .11            | .04            |
| Cortical volume             | 44.6  | 0.8   | 54.6  | .06            | .16            |

*Note.* The sibling subset was used for twin modeling. A, additive genetic; C, common environment; E, unique environment; r<sub>a</sub>, genetic correlation with %BMI<sub>p95</sub>; r<sub>e</sub>, unique environmental correlation with %BMI<sub>p95</sub>.

49 **Table S7**50 *Comparison of Direction of Causation models*

| PPS                             | Model          | AIC      | $\chi^2$ | Model comparison ( $\chi^2$ -test) |                    | $\beta$ Obesity-to-PPS [CI] | $\beta$ PPS-to-Obesity [CI] |
|---------------------------------|----------------|----------|----------|------------------------------------|--------------------|-----------------------------|-----------------------------|
|                                 |                |          |          | vs. Cholesky (p)                   | vs. Reciprocal (p) |                             |                             |
| Personality/<br>psychopathology | Cholesky       | 13068.58 | 46.77    | -                                  | -                  | -                           | -                           |
|                                 | Reciprocal     | 13067.94 | 48.14    | .242                               | -                  | .01 [-.09, .11]             | .08 [-.01, .17]             |
|                                 | Obesity-to-PPS | 13068.98 | 51.18    | .110                               | .081               | .09 [.05, .13]              | -                           |
|                                 | PPS-to-Obesity | 13065.98 | 48.17    | .496                               | .855               | -                           | .09 [.05, .12]              |
| Eating behavior                 | Cholesky       | 12862.60 | 77.99    | -                                  | -                  | -                           | -                           |
|                                 | Reciprocal     | 12861.50 | 78.89    | .342                               | -                  | .26 [.20, .32]              | .16 [.11, .20]              |
|                                 | Obesity-to-PPS | 12894.79 | 114.17   | <.001                              | <.001              | .40 [.36, .44]              | -                           |
|                                 | PPS-to-Obesity | 12917.35 | 136.74   | <.001                              | <.001              | -                           | .31 [.28, .35]              |
| Cognition                       | Cholesky       | 12780.38 | 29.10    | -                                  | -                  | -                           | -                           |
|                                 | Reciprocal     | 12778.38 | 29.10    | >.999                              | -                  | .06 [-.02, .13]             | -.01 [-.07, .05]            |
|                                 | Obesity-to-PPS | 12776.51 | 29.24    | .935                               | .713               | .05 [.00, .09]              | -                           |
|                                 | PPS-to-Obesity | 12778.52 | 31.25    | .342                               | .143               | -                           | .03 [-.01, .06]             |
| Cortical thickness              | Cholesky       | 12873.78 | 24.75    | -                                  | -                  | -                           | -                           |
|                                 | Reciprocal     | 12871.78 | 24.75    | >.999                              | -                  | .20 [.10, .30]              | -.04 [-.13, .04]            |
|                                 | Obesity-to-PPS | 12870.70 | 25.66    | .633                               | .339               | .15 [.11, .20]              | -                           |
|                                 | PPS-to-Obesity | 12884.42 | 39.39    | <.001                              | <.001              | -                           | .11 [.08, .15]              |

|                       |                |          |       |      |      |                 |                 |
|-----------------------|----------------|----------|-------|------|------|-----------------|-----------------|
| Cortical surface area | Cholesky       | 12942.59 | 21.02 | -    | -    | -               | -               |
|                       | Reciprocal     | 12940.94 | 21.36 | .559 | -    | .06 [-.02, .15] | .01 [-.06, .08] |
|                       | Obesity-to-PPS | 12938.99 | 21.42 | .822 | .819 | .07 [.03, .11]  | -               |
|                       | PPS-to-Obesity | 12941.07 | 23.50 | .290 | .144 | -               | .05 [.02, .09]  |
| Cortical volume       | Cholesky       | 12966.38 | 41.20 | -    | -    | -               | -               |
|                       | Reciprocal     | 12964.38 | 41.20 | .981 | -    | .01 [-.08, .09] | .07 [.00, .14]  |
|                       | Obesity-to-PPS | 12966.30 | 45.13 | .141 | .048 | .08 [.04, .12]  | -               |
|                       | PPS-to-Obesity | 12962.42 | 41.25 | .978 | .833 | -               | .07 [.04, .11]  |

51 *Note.* The sibling subset was used for twin modeling. Estimated parameters per model: Cholesky 11, Reciprocal 10, Obesity-to-PPS and PPS-to-  
52 Obesity 9.  $\chi^2$ , Chi-squared model fit; AIC, Akaike information criterion; CI, 95% confidence interval; PPS, poly-phenotype score.

**Table S8**

*Cross-lagged panel model (CLPM) path estimates*

|                                            |      | Autoregressive path (a) |                       | “Causal” path (c)      |                      |
|--------------------------------------------|------|-------------------------|-----------------------|------------------------|----------------------|
|                                            | N    | Obesity                 | PPS                   | Obesity-to-PPS         | PPS-to-Obesity       |
| <i>Random-intercept CLPM (three waves)</i> |      |                         |                       |                        |                      |
| Personality/psych<br>opathology            | 3482 | .47 [.40, .54]<br>***   | .13 [.07, .19]<br>*** | .03 [-.05, .11]        | .04 [.02, .07]<br>** |
| Eating behavior                            | 3497 | .46 [.39, .53]<br>***   | .11 [.06, .17]<br>*** | .11 [.03, .19]<br>**   | .02 [.00, .05]       |
| <i>Traditional CLPM (two waves)</i>        |      |                         |                       |                        |                      |
| Personality/psych<br>opathology            | 3416 | .82 [.80, .84]<br>***   | .50 [.47, .53]<br>*** | .07 [.04, .10]<br>***  | .03 [.01, .05]<br>** |
| Eating behavior                            | 3442 | .80 [.78, .83]<br>***   | .38 [.34, .43]<br>*** | .22 [.18, .26]<br>***  | .05 [.02, .08]<br>** |
| Cognition                                  | 2952 | .83 [.81, .85]<br>***   | .18 [.14, .22]<br>*** | -.04 [-.08, -.01]<br>* | -.01 [-.03, .02]     |
| Cortical thickness                         | 3215 | .82 [.80, .84]<br>***   | .66 [.63, .68]<br>*** | .08 [.05, .11]<br>***  | .00 [-.02, .02]      |
| Cortical surface<br>area                   | 3215 | .82 [.80, .84]<br>***   | .91 [.90, .92]<br>*** | .02 [.01, .03]<br>**   | .00 [-.02, .02]      |
| Cortical volume                            | 3215 | .82 [.80, .84]<br>***   | .90 [.89, .91]<br>*** | .02 [.00, .03] *       | .00 [-.02, .02]      |

*Note.* The singleton subset was used for longitudinal modeling. N, sample size; \* p <.05; \*\* p<.01; \*\*\* p<.001.

57 **Table S9**

58 Main R (R Core Team, 2020) packages used

| Analysis                                       | Package                                                          |
|------------------------------------------------|------------------------------------------------------------------|
| Twin analysis including Direction of Causation | umx (Bates et al., 2019)                                         |
| Cross-lagged panel modelling                   | lavaan (Rosseel, 2012)                                           |
| Figures                                        | ggplot2 (Wickham, 2016), ggseg (Mowinckel & Vidal-Piñeiro, 2019) |

59

**Figure S1**

*Standardized regression coefficients for the associations between the percentage of the sex- and age-specific 95<sup>th</sup> BMI percentile and control variables*

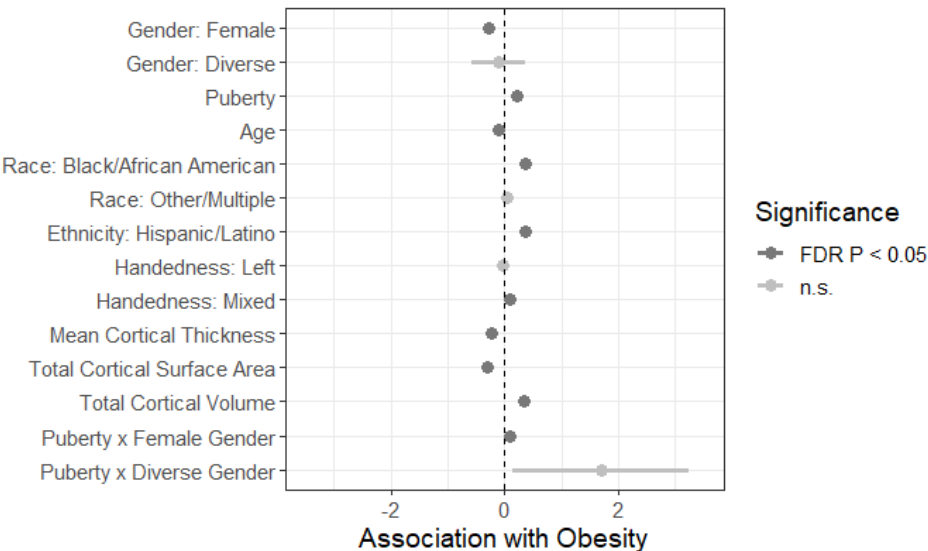

*Note.* Error bars represent 95% confidence intervals. FDR, false discovery rate.

**Figure S2**

*2D mapped associations between the percentage of the sex- and age-specific 95<sup>th</sup> BMI percentile and region of interest cortical thickness (A), cortical surface area (B) as well as cortical volume (C)*

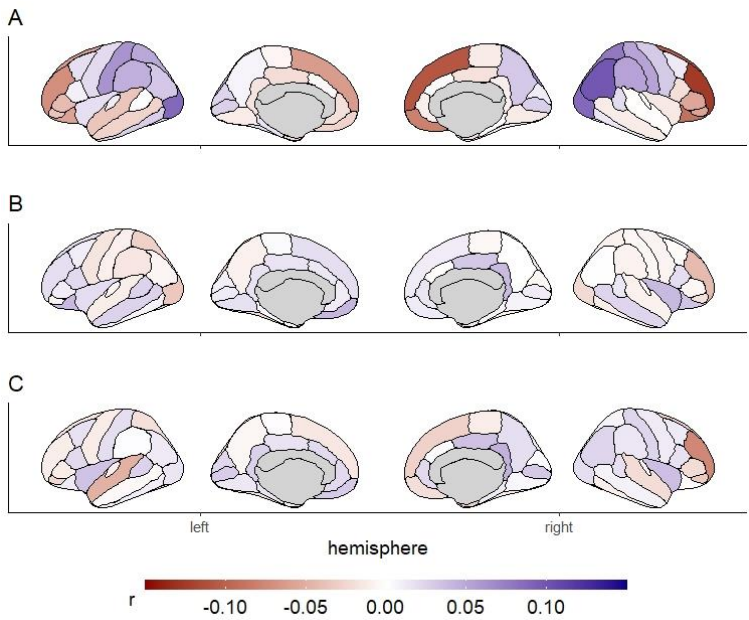

## References

- Achenbach, T. M., & Edelbrock, C. S. (1983). *Manual for the Child Behavior Checklist and Revised Child Behavior Profile*. University Associates in Psychiatry.
- Bates, T. C., Maes, H., & Neale, M. C. (2019). umx: Twin and Path-Based Structural Equation Modeling in R. *Twin Research and Human Genetics*, 22(1), 27–41. <https://doi.org/10.1017/thg.2019.2>
- Carver, C. S., & White, T. L. (1994). Behavioral inhibition, behavioral activation, and affective responses to impending reward and punishment: The BIS/BAS Scales. *Journal of Personality and Social Psychology*, 67(2), 319–333.
- Cyders, M. A., Littlefield, A. K., Coffey, S., & Karyadi, K. A. (2014). Examination of a short English version of the UPPS-P Impulsive Behavior Scale. *Addictive Behaviors*, 39(9), 1372–1376. <https://doi.org/10.1016/j.addbeh.2014.02.013>
- Goodman, R. (1997). The Strengths and Difficulties Questionnaire: A Research Note. *Journal of Child Psychology and Psychiatry*, 38(5), 581–586. <https://doi.org/10.1111/j.1469-7610.1997.tb01545.x>
- Lezak, M. D. (1976). *Neuropsychological assessment*. Oxford University Press.
- Mowinckel, A. M., & Vidal-Piñeiro, D. (2019). *Visualisation of Brain Statistics with R-packages ggseg and ggseg3d*. arXiv.
- R Core Team. (2020). *R: A language and environment for statistical computing*. R Foundation for Statistical Computing.
- Ratcliff, G. (1979). Spatial thought, mental rotation and the right cerebral hemisphere. *Neuropsychologia*, 17(1), 49–54. [https://doi.org/10.1016/0028-3932\(79\)90021-6](https://doi.org/10.1016/0028-3932(79)90021-6)
- Rosseel, Y. (2012). lavaan : An R Package for Structural Equation Modeling. *Journal of Statistical Software*, 48(2). <https://doi.org/10.18637/jss.v048.i02>
- Wechsler, D. (1949). *Wechsler Intelligence Scale for Children*. Psychological Corporation.
- Weintraub, S., Dikmen, S. S., Heaton, R. K., Tulsky, D. S., Zelazo, P. D., Bauer, P. J., Carlozzi, N. E., Slotkin, J., Blitz, D., Wallner-Allen, K., Fox, N. A., Beaumont, J. L., Mungas, D., Nowinski, C. J., Richler, J., Deocampo, J. A., Anderson, J. E., Manly, J. J., Borosh, B., ... Gershon, R. C. (2013). Cognition assessment using the NIH Toolbox. *Neurology*, 80(11 Suppl 3), S54-64. <https://doi.org/10.1212/WNL.0b013e3182872ded>
- Wickham, H. (2016). *ggplot2: Elegant Graphics for Data Analysis*. Springer.
